# Supplementary material for: Immunostimulatory short non-coding RNAs in the circulation of patients with tuberculosis infection
Source: PubMed Central journal article supplement — Mol Ther Nucleic Acids. 2024 Feb 22;35(1):102156. doi: 10.1016/j.omtn.2024.102156 (PMC10933579; doi:10.1016/j.omtn.2024.102156), 2024-02-22
Supplement: mmc1.pdf [file mmc1.pdf]

**OMTN, Volume 35**

**Supplemental information**

**Immunostimulatory short non-coding RNAs  
in the circulation of patients  
with tuberculosis infection**

**Justin Gumas, Takuya Kawamura, Megumi Shigematsu, and Yohei Kirino**

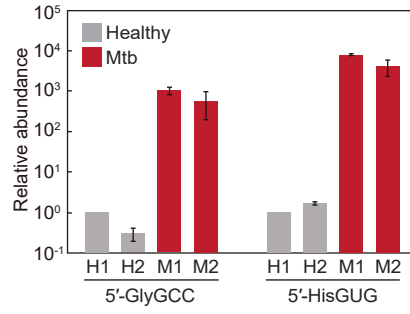

**Figure S1. Drastic upregulation of 5'-tRNA halves in plasma samples from Mtb-infected patients**

Plasma RNAs were subjected to TaqMan RT-qPCR for specific quantification of 5'-half<sup>GlyGCC</sup> and 5'-half<sup>HisGUG</sup>. Spike-in RNA was added during RNA extraction, and its levels were used for normalization. The abundance value of sample H1 was set as 1, and relative abundances for the other samples are shown.

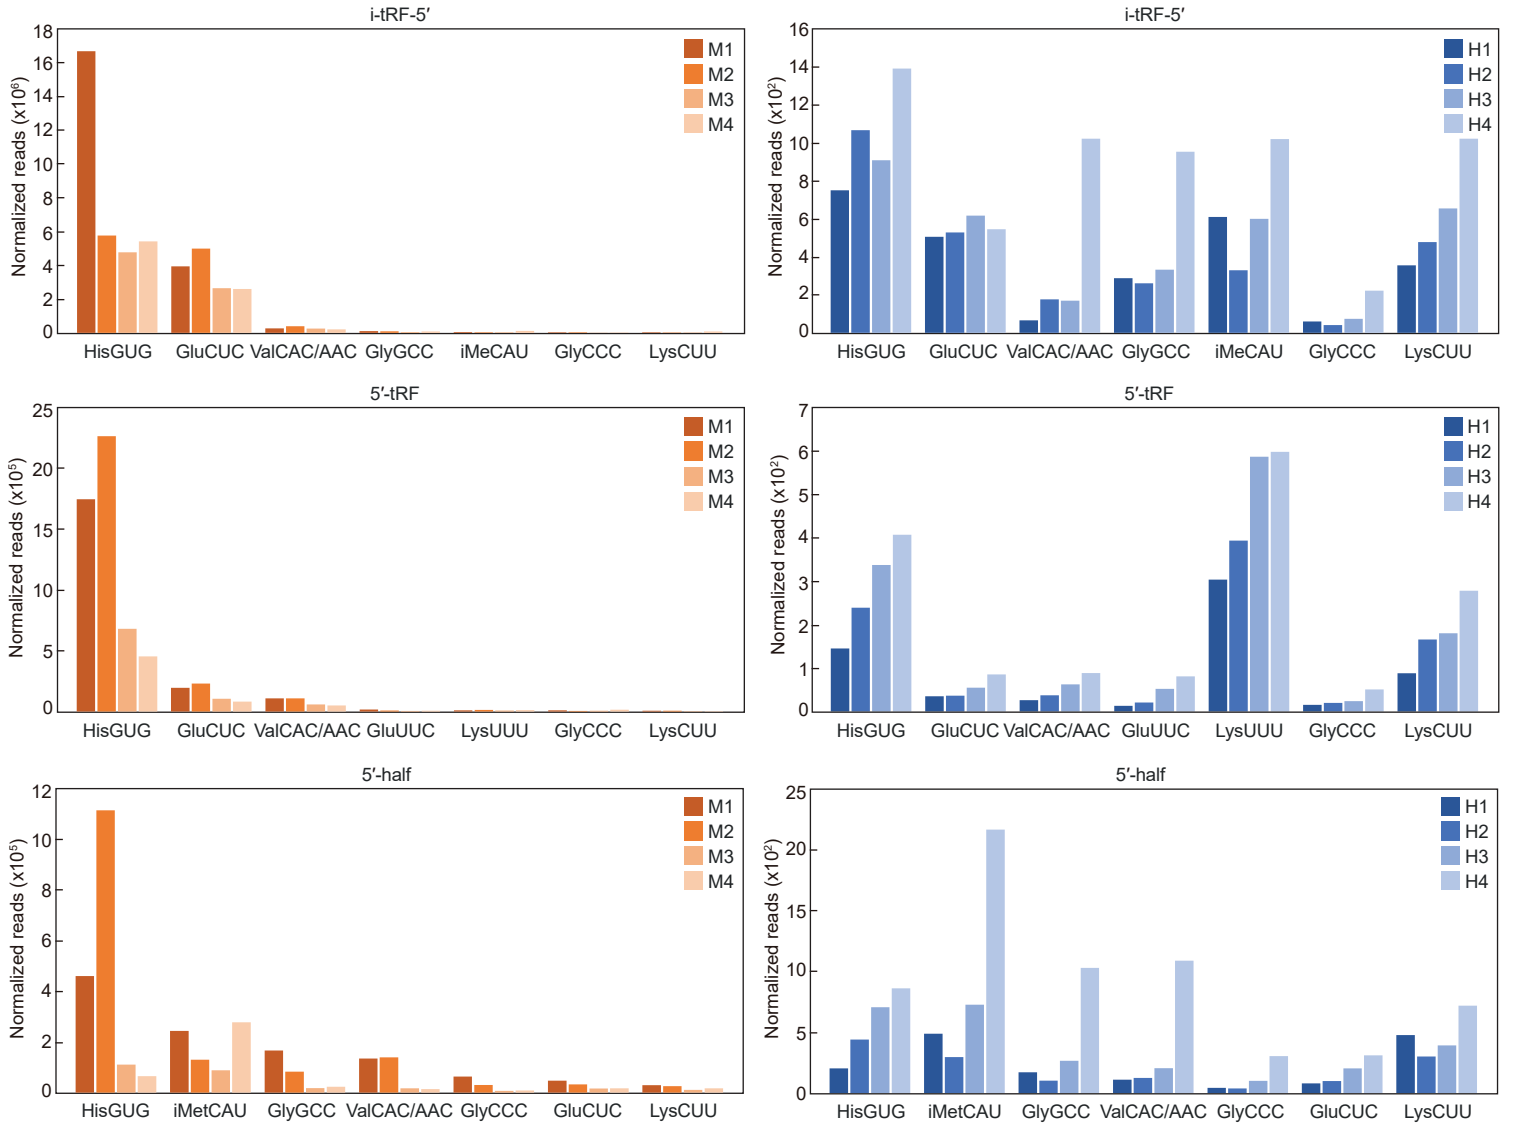

**Figure S2. Abundant isoacceptors producing 5'-derivatives of tRNA-derived sncRNAs**

Normalized read counts of i-tRFs-5', 5'-tRFs, and 5'-halves, which originate from the top 6 isoacceptors of each class in Mtb samples and were ordered by abundance in M1.

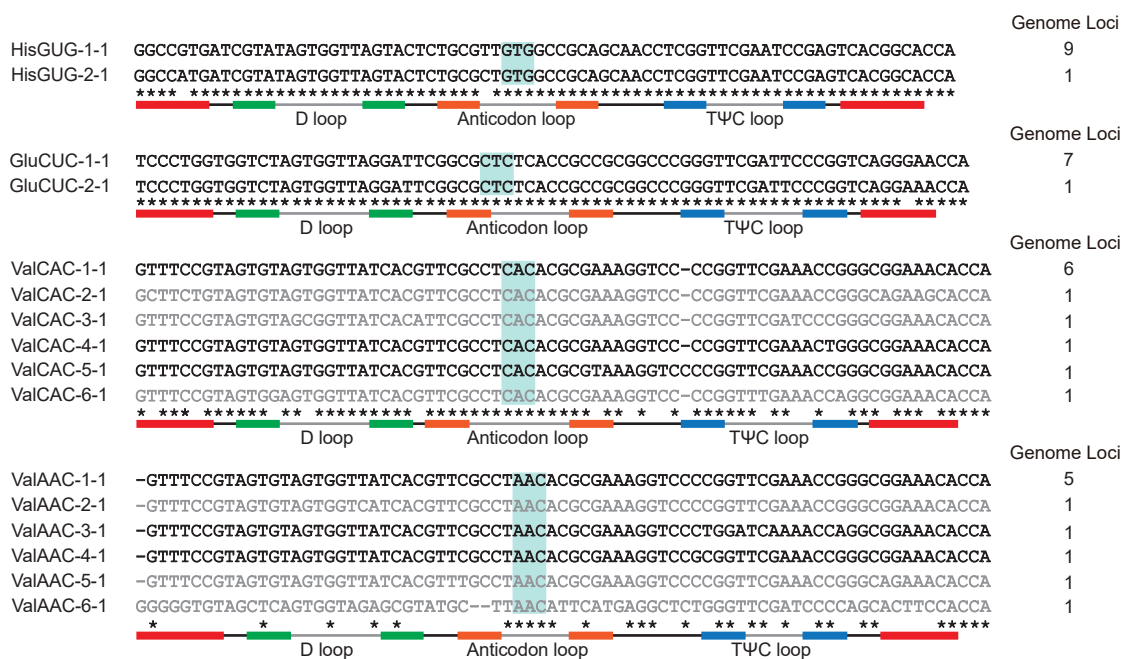

**Figure S3. Isodecoder sequences of four cytoplasmic tRNAs**

The isodecoders —unique sequences of tRNA distinguished by the gene ID — responsible for generating the abundant sncRNAs shown in Fig. 3A are highlighted in bold black. Sequence alignments were prepared using Clustal Omega. “Genome loci” indicates the number of gene copies on the genome.

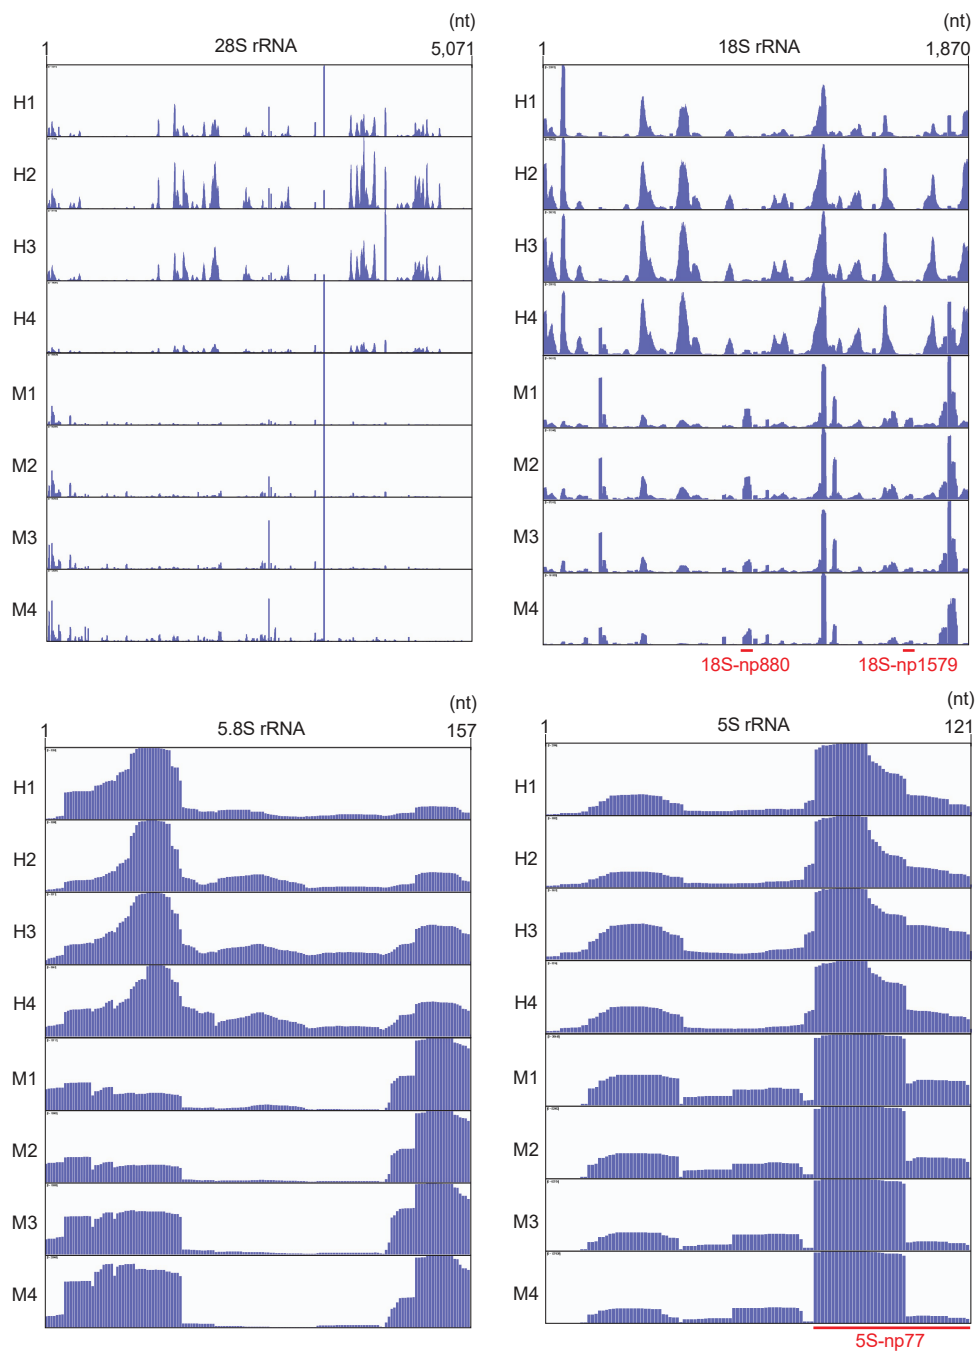

**Figure S4. Alignments of rRF reads**

The alignments were visualized using the IGV, and the positions of the three rRFs examined in this study are indicated by red lines.

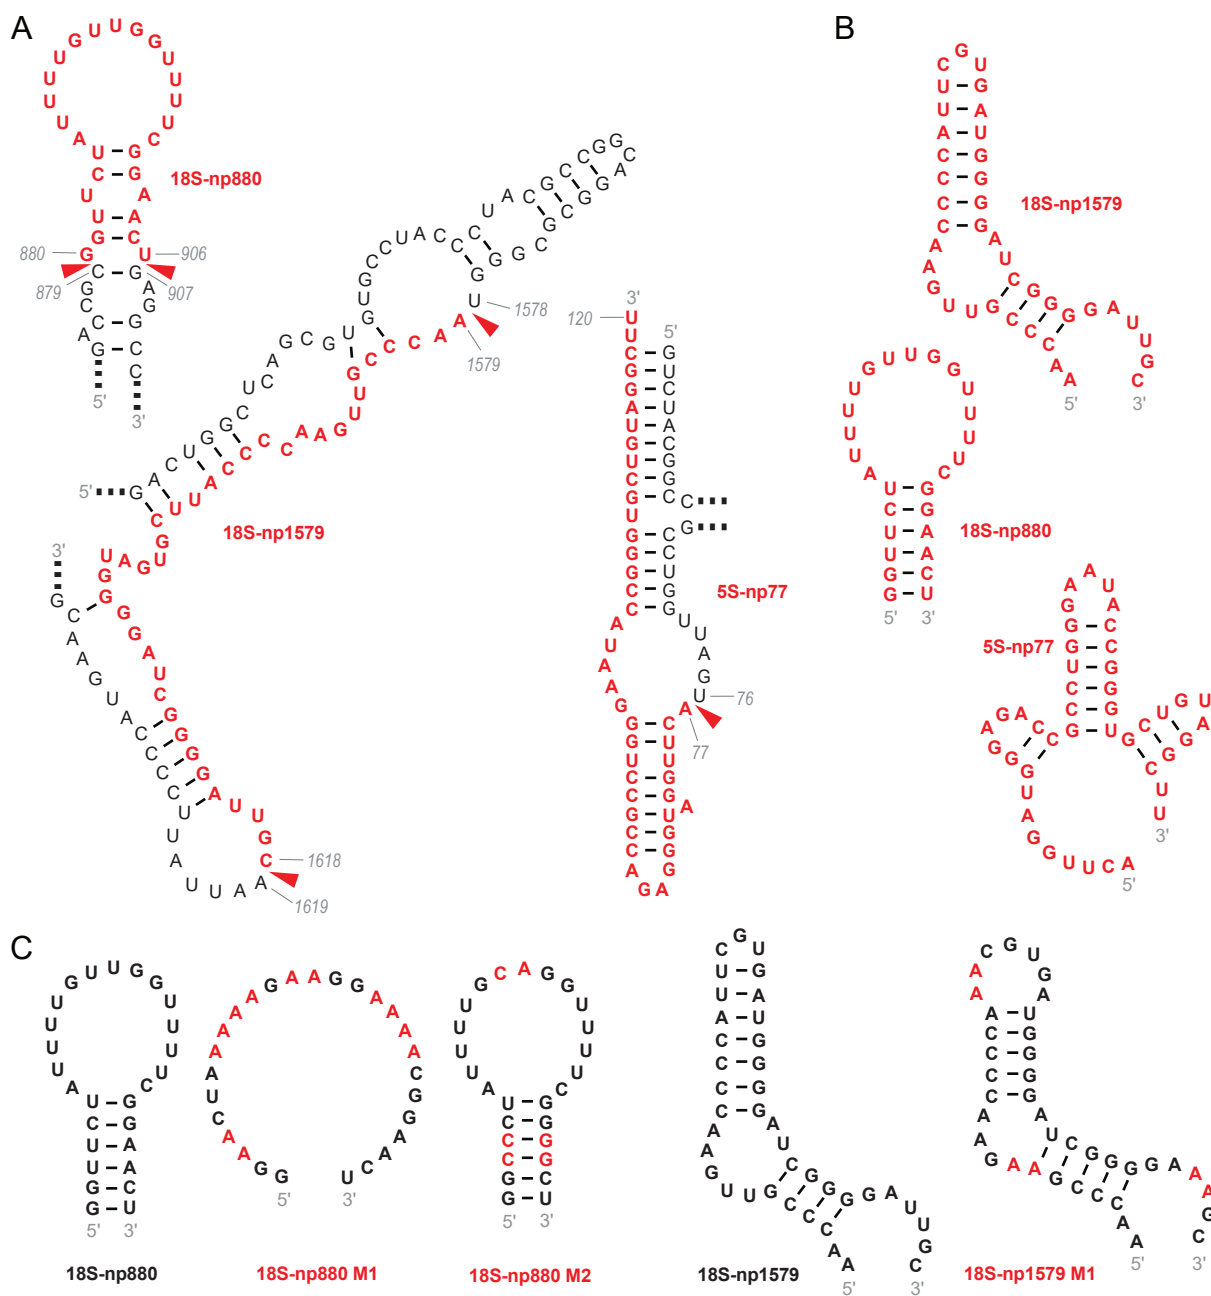

**Figure S5. Secondary structures of the characterized rRFs**

(A) Secondary structures of rRFs within their parent rRNAs before cleavage, with the rRF sequences highlighted in red. (B) Secondary structures of the rRFs, predicted using RNAfold. (C) Secondary structures of both the wild type and mutant forms of 18S-np880 and 18S-np1579.

**Table S1. Fold change and P-value of the snRNAs highlighted in this study, obtained by DESeq2**

| Type | Isoacceptor/Gene | Class/Name      | Sequence                                                    | Fold change | Adjusted P-value |
|------|------------------|-----------------|-------------------------------------------------------------|-------------|------------------|
| tRNA | HisGUG           | i-tRF-5'        | CGUAUAGUGGUUAGUACUCUGCGU                                    | 6836        | 3.09E-92         |
| tRNA | HisGUG           | i-tRF-5'        | CGUAUAGUGGUUAGUACUCUGCGC                                    | 5582        | 5.78E-65         |
| tRNA | HisGUG           | i-tRF-5'        | CGUGAUCGUAUAGUGGUUAGU                                       | 6330        | 2.47E-105        |
| tRNA | HisGUG           | 5'-tRF          | GCCGUGAUCGUAUAGUGGUU                                        | 4030        | 6.70E-113        |
| tRNA | HisGUG           | 5'-tRF          | GCCGUGAUCGUAUAGUGGUU                                        | 5906        | 2.47E-105        |
| tRNA | HisGUG           | 5'-tRF          | GCCGUGAUCGUAUAGUGGUUAGU                                     | 1106        | 3.90E-39         |
| tRNA | HisGUG           | 5'-tRF          | GCCGUGAUCGUAUAGUGGUUAGUACU                                  | 1842        | 9.60E-58         |
| tRNA | HisGUG           | 5'-half         | GCCGUGAUCGUAUAGUGGUUAGUACUCUGCGUUG                          | 403         | 2.78E-21         |
| tRNA | HisGUG           | 5'-half         | GCCGUGAUCGUAUAGUGGUUAGUACUCUGCGUU                           | 772         | 2.33E-33         |
| tRNA | HisGUG           | 5'-half         | GCCGUGAUCGUAUAGUGGUUAGUACUCUGCGU                            | 1335        | 1.14E-49         |
| tRNA | GluCUC           | i-tRF-5'        | AGGAUUCGGCGCUCU                                             | 5832        | 7.22E-102        |
| tRNA | GluCUC           | i-tRF-5'        | AGUGGUUAGGAUUCGGC                                           | 6329        | 1.88E-127        |
| tRNA | GluCUC           | i-tRF-5'        | AGGAUUCGGCGCUCUC                                            | 1177        | 4.03E-80         |
| tRNA | GluCUC           | i-tRF-5'        | GGUCUAGUGGUUAGGAU                                           | 4021        | 5.16E-72         |
| tRNA | GluCUC           | i-tRF-5'        | GGUGGUCUAGUGGUUAGGAU                                        | 6293        | 1.73E-108        |
| tRNA | GluCUC           | 5'-tRF          | UCCUGGUGGUCUAGUGGUUAGGAU                                    | 4664        | 2.44E-77         |
| tRNA | GluCUC           | 5'-tRF          | UCCUGGUGGUCUAGUGGUUAGGAUUCGGC                               | 3969        | 2.09E-49         |
| tRNA | GluCUC           | 5'-half         | UCCUGGUGGUCUAGUGGUUAGGAUUCGGCGC                             | 121         | 3.21E-15         |
| tRNA | GluCUC           | 5'-half         | UCCUGGUGGUCUAGUGGUUAGGAUUCGGCGCU                            | 161         | 4.40E-31         |
| tRNA | ValCAC/AAC       | 5'-tRF          | GUUUCCGUAGUGUAGUGGUU                                        | 4863        | 3.24E-38         |
| tRNA | ValCAC/AAC       | 5'-tRF          | GUUUCCGUAGUGUAGUGGUU                                        | 3446        | 4.22E-24         |
| tRNA | ValCAC/AAC       | 5'-half         | GUUUCCGUAGUGUAGUGGUUAUCACGUUCGCCU                           | 318         | 1.67E-16         |
| tRNA | ValCAC/AAC       | 5'-half         | GUUUCCGUAGUGUAGUGGUUAUCACGUUCGCC                            | 73          | 9.17E-08         |
| rRNA | 18S              | 18S-np880-906   | GCUUAAUACGACUCACUAUAGGUUCUA                                 | 41          | 7.89E-06         |
| rRNA | 18S              | 18S-np1579-1618 | CCUGCAGUAAUACGACUCACUAUAGGGAGAUCAACGGGUUCUGAUGAGUCCGUGAGGAC | 492         | 7.64E-38         |
| rRNA | 5S               | 5S-np77-120     | CCUGCAGUAAUACGACUCACUAUAGGGAGACCAUCCAAGUCUGAUGAGUCCGUGAGGAC | 16          | 2.24E-12         |

**Table S2. Human plasma samples**

| Name | ID         | Age | Sex  |
|------|------------|-----|------|
| H1   | BRH1552217 | 33  | Male |
| H2   | BRH1552218 | 30  | Male |
| H3   | BRH1552219 | 32  | Male |
| H4   | BRH1552220 | 34  | Male |
| M1   | BRH1576558 | 30  | Male |
| M2   | BRH1576559 | 33  | Male |
| M3   | BRH1576560 | 35  | Male |
| M4   | BRH1576561 | 33  | Male |

**Table S3. Sequences of spike-in RNAs**

| Name | Sequence (5'-to-3')                      |
|------|------------------------------------------|
| 1.P  | UGCCUCGAAUUGAGCAUGACGCGCGGUUCUUUC/3Phos/ |
| 2.P  | GCUGGGAUUGGUUUUGAUCGUUCCUUGCUC/3Phos/    |

**Table S4. Unique ID for the sncRNAs investigated in this study**

| Name               | Sequence (5'-to-3')                         | License plate             | tDRname                |
|--------------------|---------------------------------------------|---------------------------|------------------------|
| GlyGCC 5'-half     | GCAUUGGUGGUUCAGUGGUAGAAUUCUCGCCUGC          | tRF-34-PNR8YP9LON4VHM     | tDR-1:35-Gly-GCC-2-M3  |
| HisGUG 5'-half     | GCCGUGAUCGUAGUGGUUAGUACUCUGCGUUG            | tRF-34-PW5SVP9N15WV2P     | tDR-1:34-His-GTG-1     |
| ValCAC/AAC 5'-half | GUUUCGUGAGUGUAGUGGUUACACGUUCGCCU            | tRF-33-79MP9P9NH57SD3     | tDR-1:33-Val-AAC-1-M6  |
| ValCAC/AAC 5'-tRF  | GUUUCGUGAGUGUAGUGGUU                        | tRF-20-79MP9P9N           | tDR-1:20a-Val-AAC-1-M9 |
| 18S-np880-906      | GGUUCUAUUUUGUUGGUUUUCGGAACU                 | rRF-27-R9VZ9Y7ZMB3        | (N/A)                  |
| 18S-np1579-1618    | AACCCGUUGAACCCCAUUCGUGAUGGGGAUCGGGGAUUGC    | rRF-40-BR7U0RISX4REMKIV   | (N/A)                  |
| 5S-np77-120        | ACUUGGAUGGGAGACCGCCUGGGAUACCGGGUGCUGUAGGCUU | rRF-44-EY585DL7RBUSRV9PIQ | (N/A)                  |
| 18S-np880-906 M1   | GGAACUAAAAGAAGGAAAACGGAACU                  | nlr-27-6DUBF0OBMB3        | (N/A)                  |
| 18S-np880-906 M2   | GGCCCUAUUUUGCAGGUUUUCGGGGCU                 | nlr-27-6RVZXP7ZMK3        | (N/A)                  |
| 18S-np1579-1618 M1 | AACCCGAAGAACCCCAACGUGAUGGGGAUCGGGGAAAGC     | nlr-40-BRO20RBHX4REMKBJ   | (N/A)                  |



**Table S5. Sequences of the oligos used in this study**

| Experiment                    | Target             | Type           | Sequence (5'-to-3')                                                             |
|-------------------------------|--------------------|----------------|---------------------------------------------------------------------------------|
| TaqMan qPCR                   | 5'-HisGUG          | Forward primer | GCTCGCCGTGATCGTATAGT                                                            |
|                               |                    | TaqMan probe   | /5HEX/TAGTACTCT/ZEN/GCGTTGGAACACTGCGTTTGC/3IABkFQ/                              |
|                               | 5'-GlyGCC          | Forward primer | GCATTGGTGGTTCAGTGGT                                                             |
|                               |                    | TaqMan probe   | /56-TAMN/ATTCTCGCCTGCGAACACTGCG/3IAbRQSp/                                       |
|                               | 5'-ValCAC/AAC      | Forward primer | GTTTCCGTAGTGTAGTGGT                                                             |
|                               |                    | TaqMan probe   | /56-FAM/ACGTTTCGCC/ZEN/TGAACACTGCGTT/3IABkFQ/                                   |
|                               | R-Luc              | Forward primer | GAGGCAAGCCCGACGT                                                                |
|                               |                    | TaqMan probe   | /56-FAM/GATTGTCCG/ZEN/CGAACACTGCGT/3IABkFQ/                                     |
| <i>In vitro</i> transcription | ValCAC/AAC 5'-half | Forward primer | CCTGCAGTAATACGACTCACTATAGGGAGACTACGGAAACCTGATGAGTCCGTGAGGAC                     |
|                               |                    | Reverse primer | mAmGGCGAACGTGATAACCACTACACTACGGAAACGACGGTACCGGGTACCGTTTCGTCTCACGGACT            |
|                               | ValCAC/AAC 5'-tRF  | Forward primer | CCTGCAGTAATACGACTCACTATAGGGAGACTACGGAAACCTGATGAGTCCGTGAGGAC                     |
|                               |                    | Reverse primer | mAmACCACTACACTACGGAAACGACGGTACCGGGTACCGTTTCGTCTCACGGACT                         |
|                               | 18S-np880-906      | Forward primer | GCTTAATACGACTCACTATAGGTTCTA                                                     |
|                               |                    | Reverse primer | mAmGTTCCGAAAACCAACAAAATAGAACC                                                   |
|                               | 18S-np1579-1618    | Forward primer | CCTGCAGTAATACGACTCACTATAGGGAGATCAACGGGTTCTGATGAGTCCGTGAGGAC                     |
|                               |                    | Reverse primer | mGmCAATCCCGATCCCCATCACGAATGGGGTTCAACGGGTTGACGGTACCGGGTACCGTTTCGTCTCACGGACT      |
|                               | 5S-np77-120        | Forward primer | CCTGCAGTAATACGACTCACTATAGGGAGACCATCCAAGTCTGATGAGTCCGTGAGGAC                     |
|                               |                    | Reverse primer | mAmAGCCTACAGCACCCGGTATTCCCAGGCGGTCTCCCATCCAAGTGACGGTACCGGGTACCGTTTCGTCTCACGGACT |

A universal reverse primer (5'-GATCGTCCGACTGTAGAACTC-3') was used for all TaqMan RT-qPCR.
